# Supplementary material for: Traditional Food and Medicine: Ethno-Traditional Usage of Fish Fauna across the Valley of Kashmir: A Western Himalayan Region
Source: MDPI journal article supplement (doi:10.3390/d14060455), 2022-06-06
Supplement: s1 [file s1]

Archive with 1 entries (1 files):
- diversity-1732957-supplementary.pdf
