# Supplementary material for: Traditional Food and Medicine: Ethno-Traditional Usage of Fish Fauna across the Valley of Kashmir: A Western Himalayan Region
Source: MDPI journal article supplement (doi:10.3390/d14060455), 2022-06-06
Supplement: s1 [file s1 › diversity-1732957-supplementary.pdf]

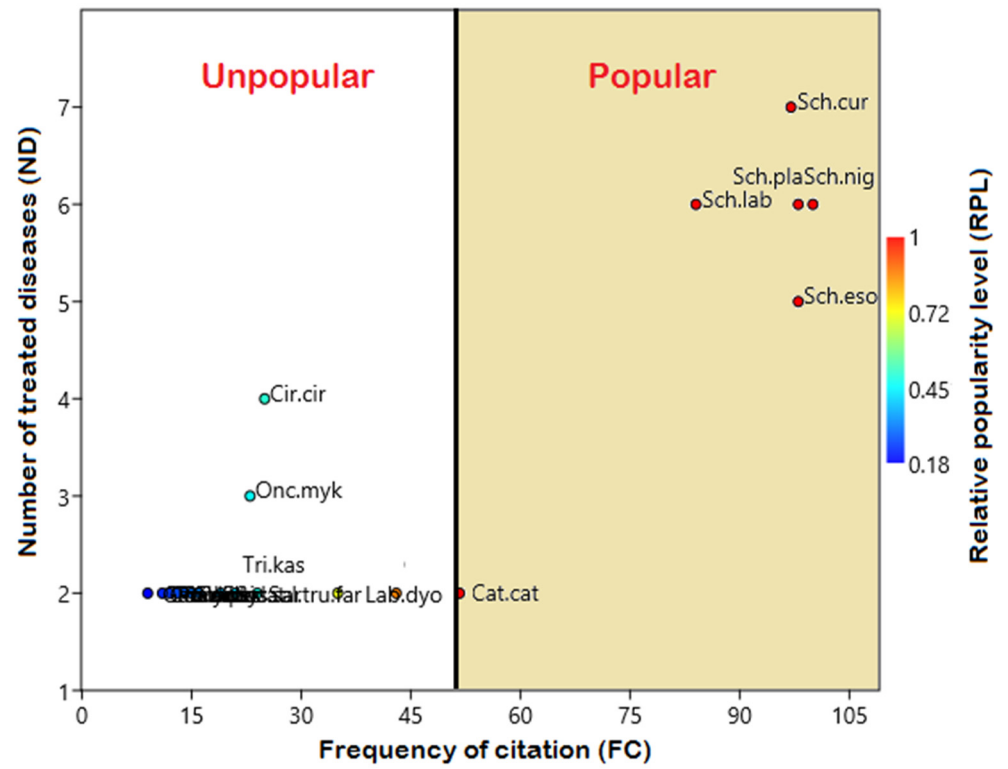

**Figure S1.** The relationship between informant numbers and the percentage of informants who argued a similar use for a particular fish. The complete names of the fish can be found in Table 2.
